# Supplementary material for: Coordination of LMO7 with FAK Signaling Sustains Epithelial Integrity in Renal Epithelia Exposed to Osmotic Pressure
Source: MDPI journal article supplement (doi:10.3390/cells11233805), 2022-11-28
Supplement: s1 [file s1]

## Supplementary method

### *Cell Culture, secretome preparation, and secretome profiling*

NERK52E cells were purchased from ATCC. The  $10^5$  cells were seeded on 100 mm peri dish in DMEM medium supplemented with 10% fetal bovine serum (FBS) at 37 °C in a humidified atmosphere at 5% CO<sub>2</sub> for two days. Then, those DMEM media were removed. For secretome profiling, cells were cultured in 10 mL serum free isotonic DMEM, and 10 mL 620 mOsm/kg hypertonic DMEM for 24 hours, respectively. Then, the conditioned media were collected. The conditioned media were concentrated with with Spin-X Concentrators (Life Sciences, Tewksbury, MA, USA).

To profile secretome, the secretome proteins 10 g was subjected to proteomic analysis. The Ingenuity pathway analysis (IPA) was applied to analyze proteins in isotonic secretome and hypertonic secretome. Prediction of IPA analysis and Genecards was described in table S1, supplementary table S2, and supplementary figure S1 A,B.

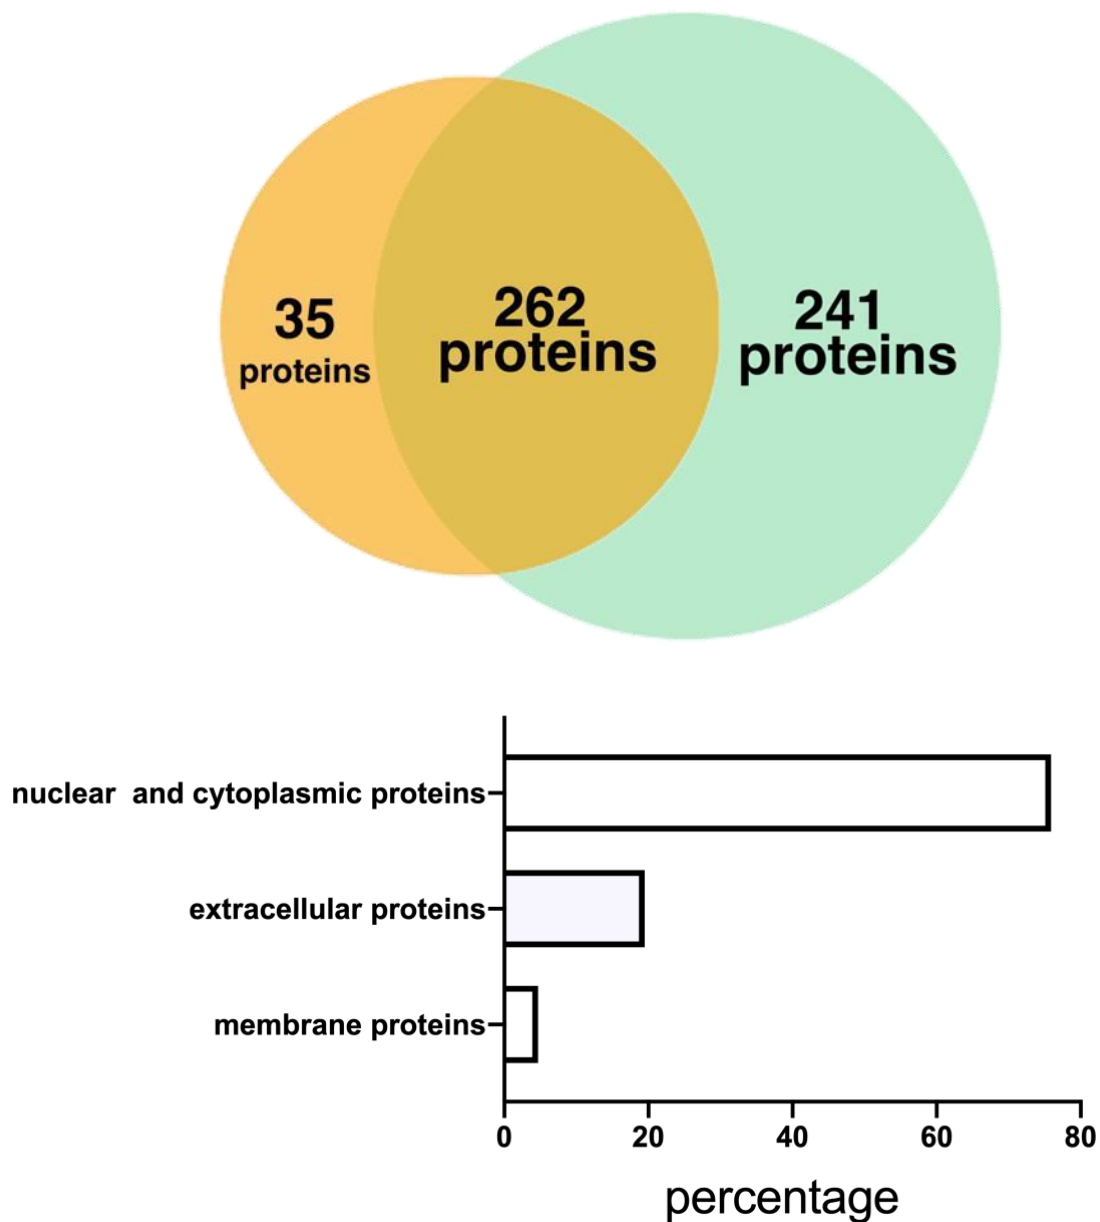

**Figure S1.** Result of pathway analysis for proteins identified in hypertonic secretome.

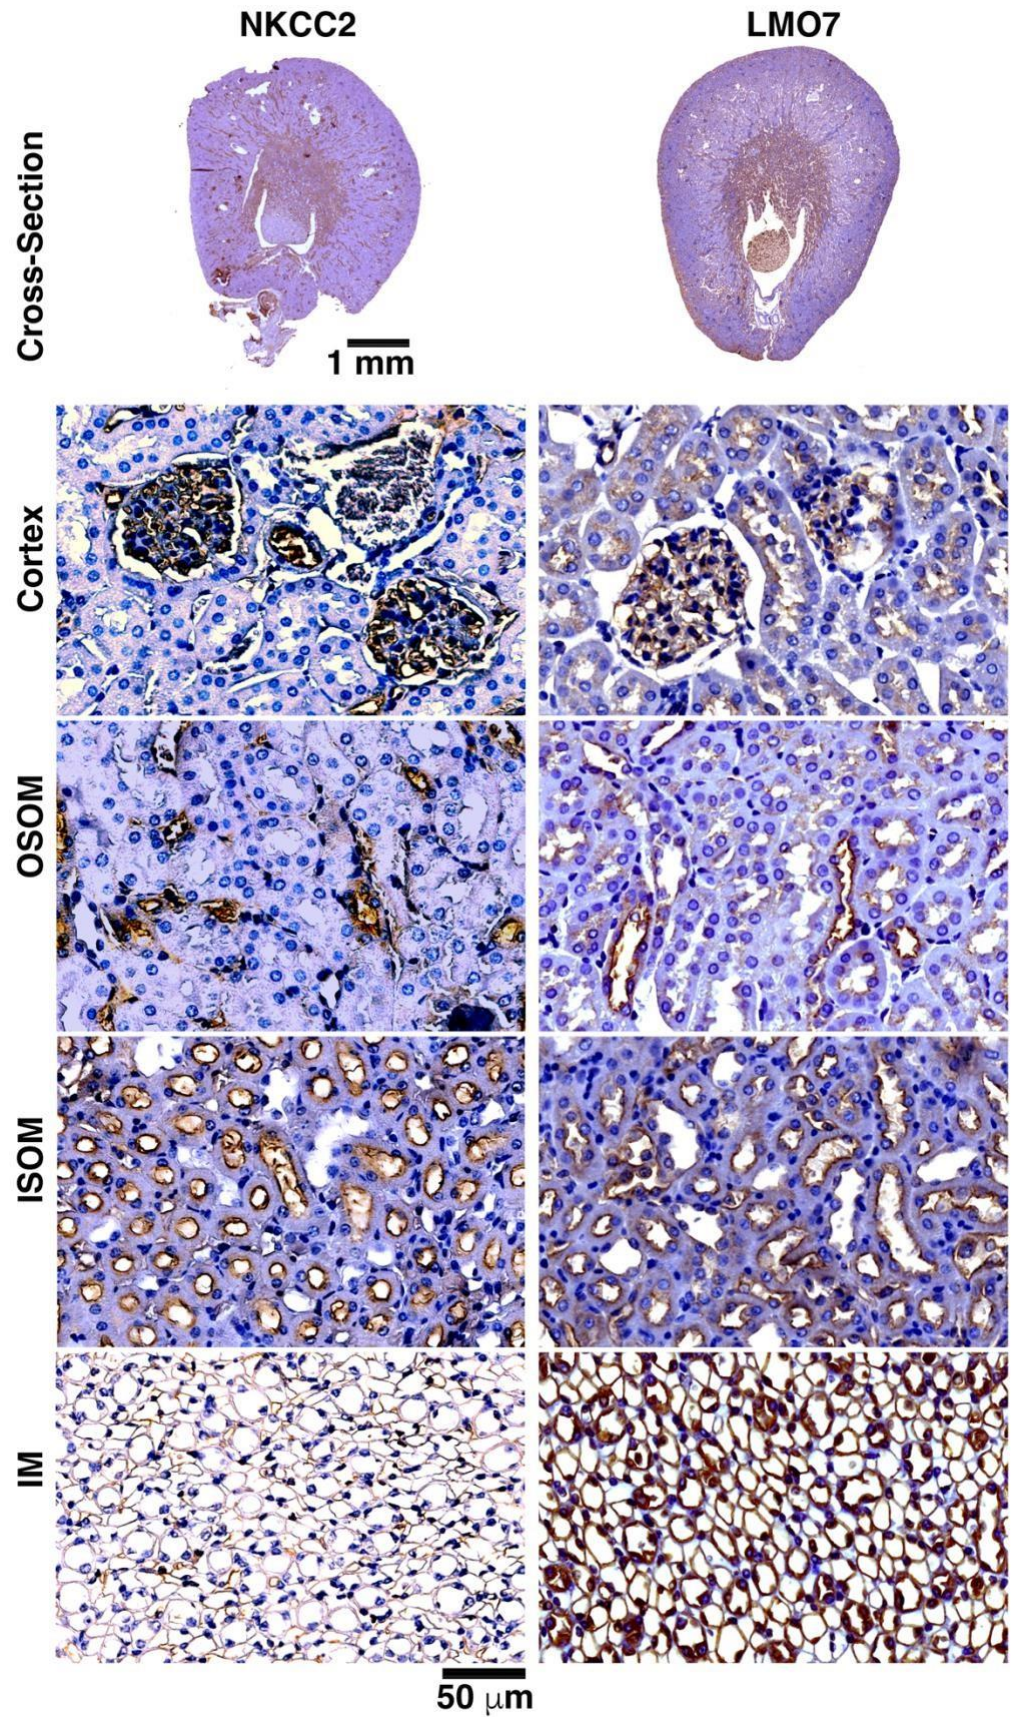

**Figure S2.** NKCC2 predominantly distributes in the renal tubules in the inner stripe of the outer medulla (OSOM) and inner medulla (IM). The kidney biopsies were probed with antibodies against NKCC2 and LMO7. Immunohistochemical staining showed that the NKCC2 was detected in glo-

meruli, renal tubules in ISOM, and IM. Similarly, the LMO7 also expressed in glomeruli, renal tubules in ISOM, and IM. LMO7 and NKCC2 were part of renal tubules in the outer stripe of the outer medulla (OSOM).

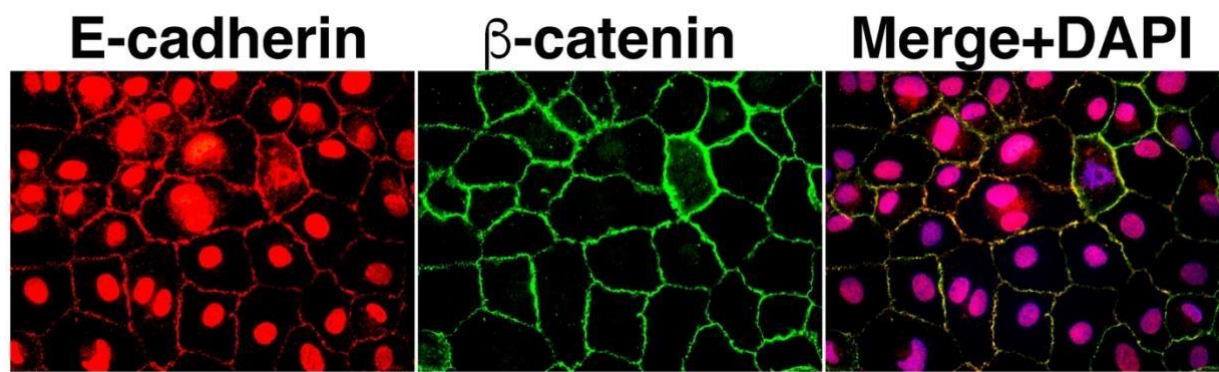

**Figure S3.** NRK-52E epithelial sheet bears epithelial character. NRK-52E cells were cultured in DMEM supplemented 10% FBS for 4 days to grow epithelial sheet. The epithelial character of NRK-52E epithelial sheet was characterized with immunofluorescent staining, which implied the E-cadherin (red) and  $\beta$ -catenin (green) both are present in cell-cell junctions in the boundary between two adjacent cells. The E-cadherin and  $\beta$ -catenin both are present in junctional area, and loss of junctional integrity is absent in the NRK-52E epithelial sheet. Bar = 20  $\mu$ m.

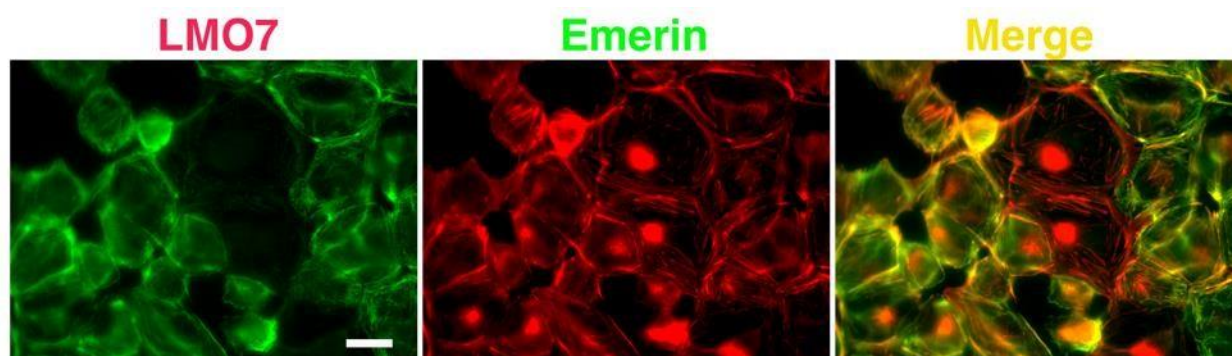

**Figure S4.** Disordered F-actin fibers are present in cortex of NRK-52E cells with LMO7 depletion. The NRK-52E cells were transfected with shRNA targeted to LMO7. Antibody against LMO7 (green) and Alexa-584 conjugated phalloidin (red) were subjected to stain LMO7 and F-actin. The cortical F-actin stress fibers are not disorderedly distributed in junctional boundaries in the cells with LMO7 depletion. Bar = 20  $\mu$ m.

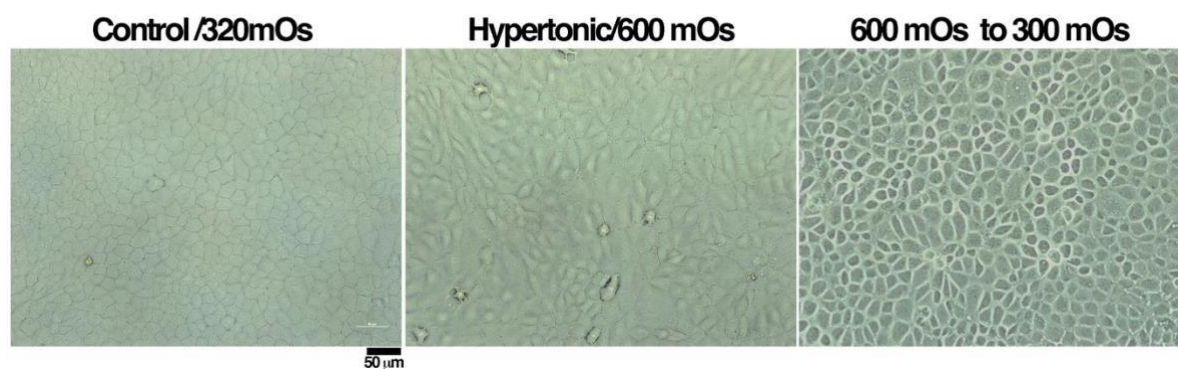

**Figure S5.** Osmotic alternation leads to broaden the junctional linkage between two adjacent cells. The NRK-52E epithelial sheets were cultured in 320 mOsm/kg isotonic, 620 mOsm/kg hypertonic medium, and 620/320 mOsm/kg osmotic alternation (including 620mOsm/kg an hour and following 320 mOsm/kg for another hour) for two hours, respectively. Epithelial sheets were visualized with Nomarski interference contrast. The interfaces between two adjacent cells are getting bigger in the cells cultured in 620/320 mOsm/kg hypertonic-isotonic alternation.

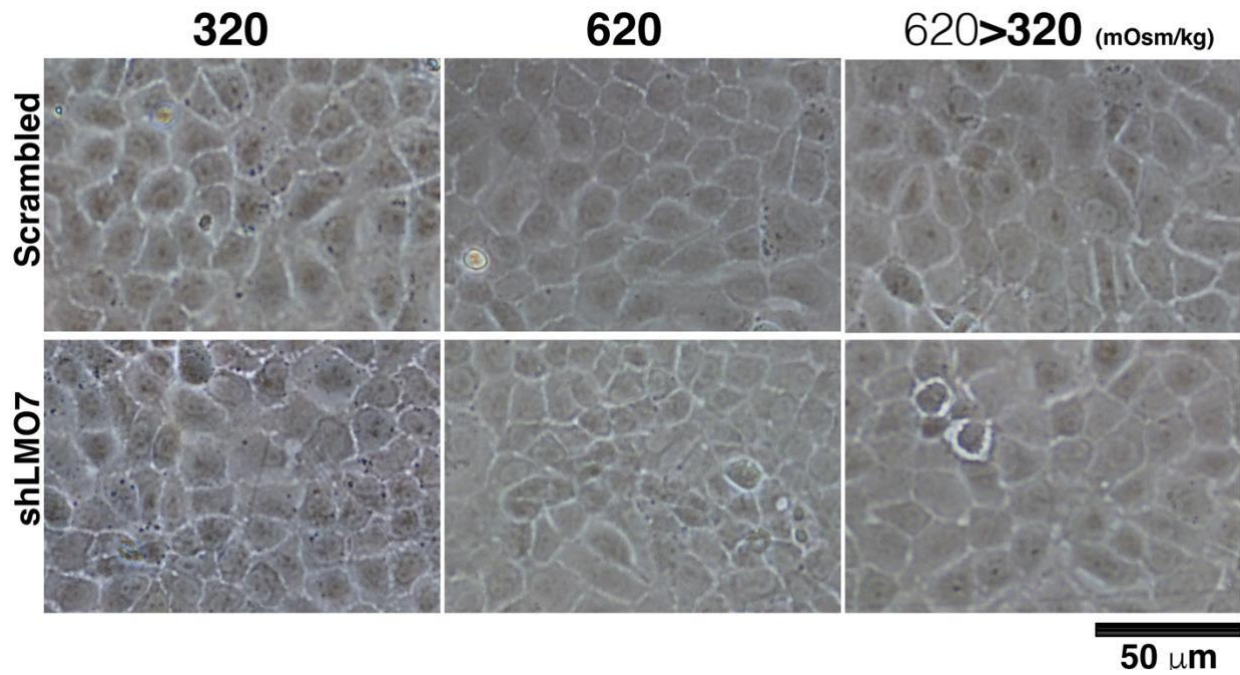

**Figure S6.** Loss of junctional integrity is apparently present in the shLMO7 depleted NRK52E epithelial sheet. The epithelial sheets were visualized with Nomarski interference contrast microscopy. Under isotonic-hypertonic alternation, although epithelia in epithelial sheets displayed boundaries between two adjacent cells were broadening, loss of junctional integrity is not visible in the NRK-52E epithelial sheet without LMO7 depletion. Boundaries between two adjacent cells are widening in the LMO7 depleted NRK-52E epithelial sheet under hypertonicisotonic alternation. Also, loss of junctional integrity was visible in the LMO7 depleted NRK52E epithelial sheet under hypertonic-isotonic alternation.

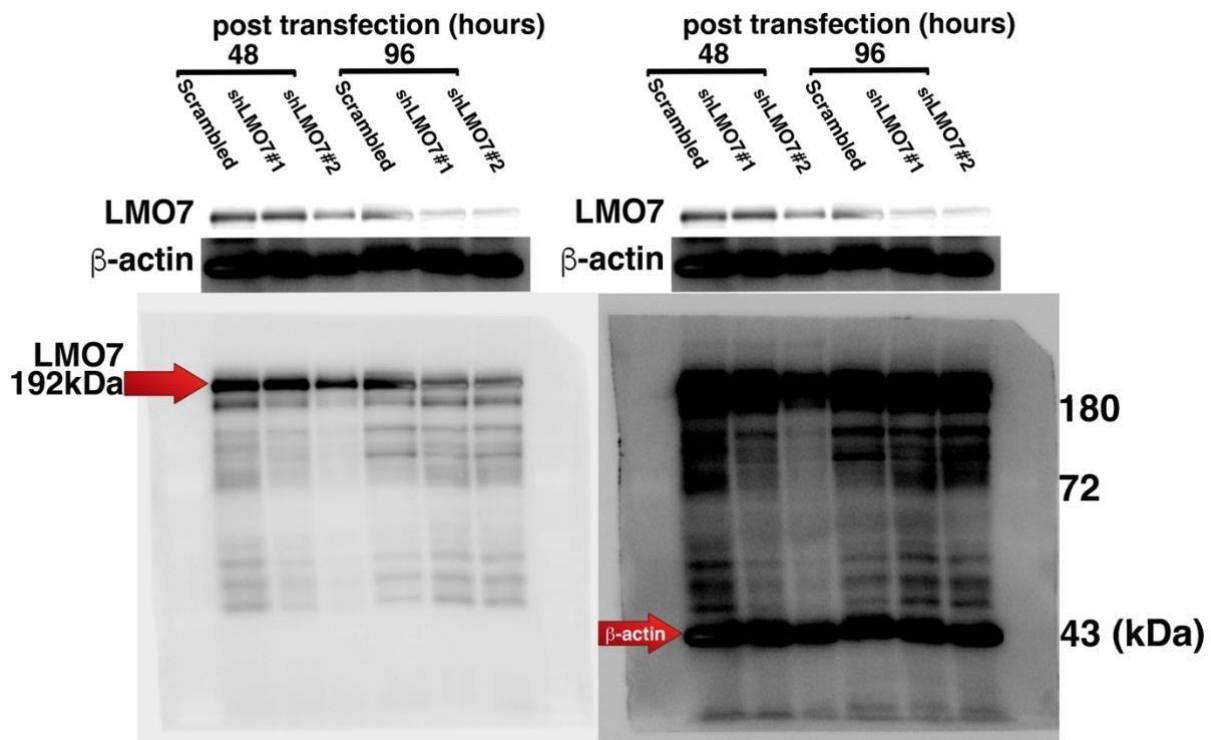

**Figure S7.** LMO7 depletion by small interfering RNA (shRNA) in NRK-52E cells. Western blot analysis indicated that the shLMO7#1 and shLMO7#2 transfection reduces endogenous LMO7 expression levels in NRK-52E cells.

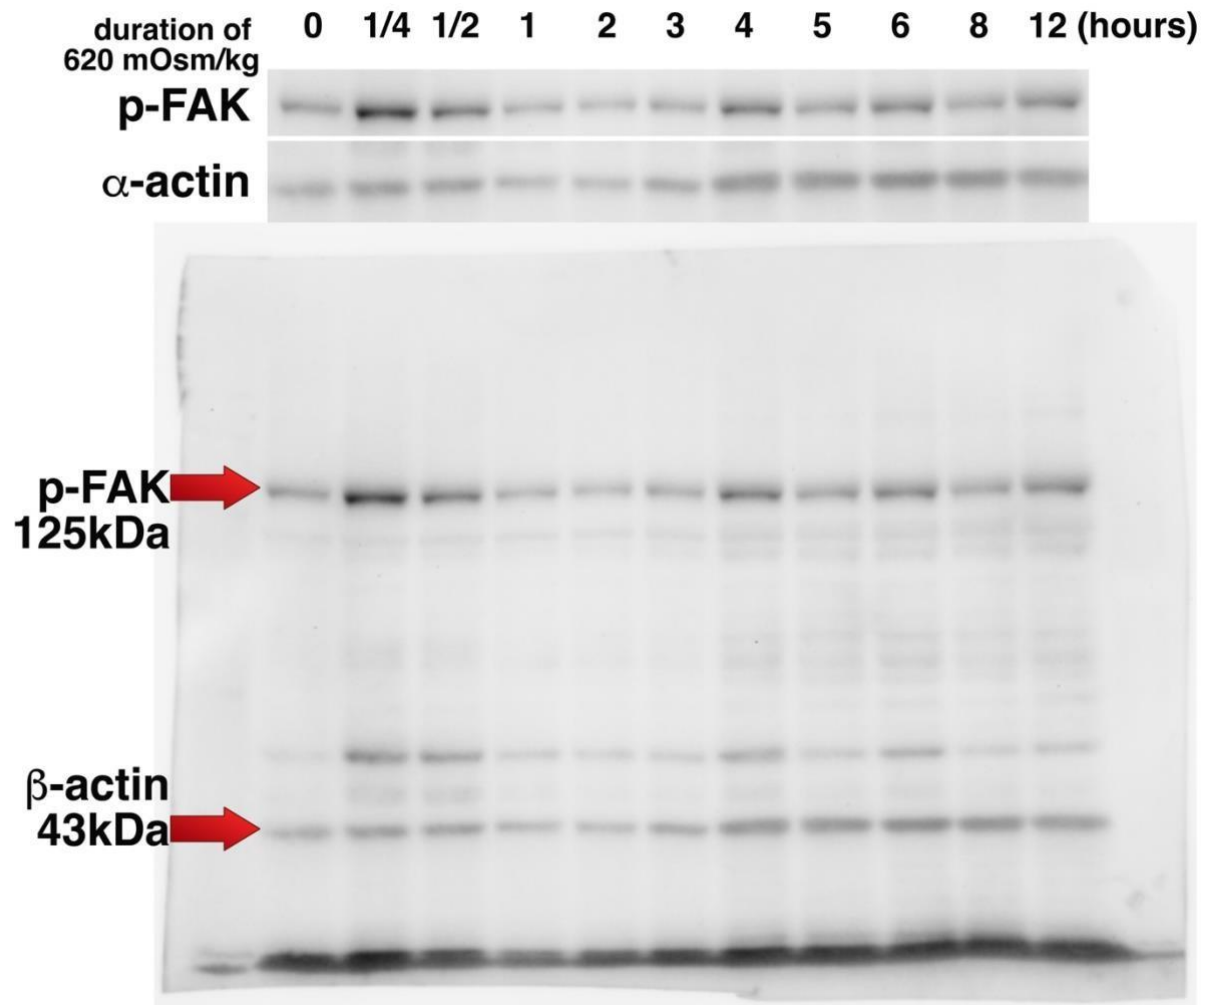

**Figure S8.** Western analysis examined FAK phosphorylated during 620 mOsm/kg administration.

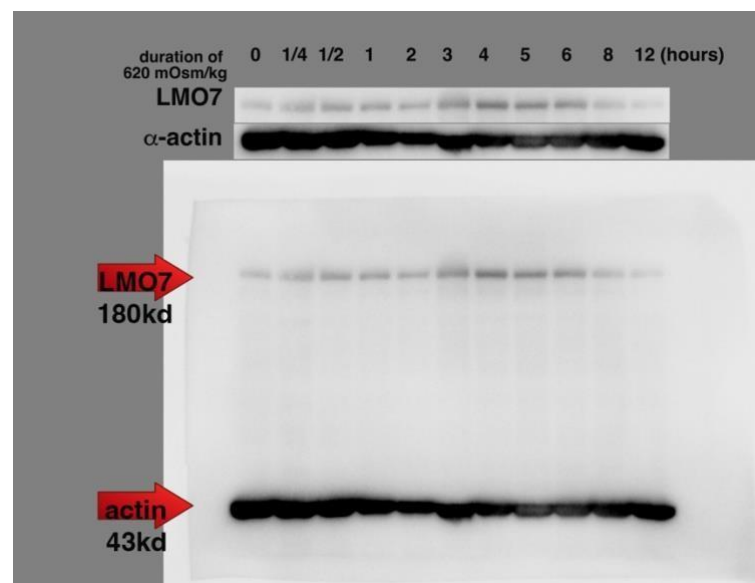

**Figure S9.** Elevation of LMO7 expression levels in NRK-52E cells by 620 mOsm/kg stimulation.

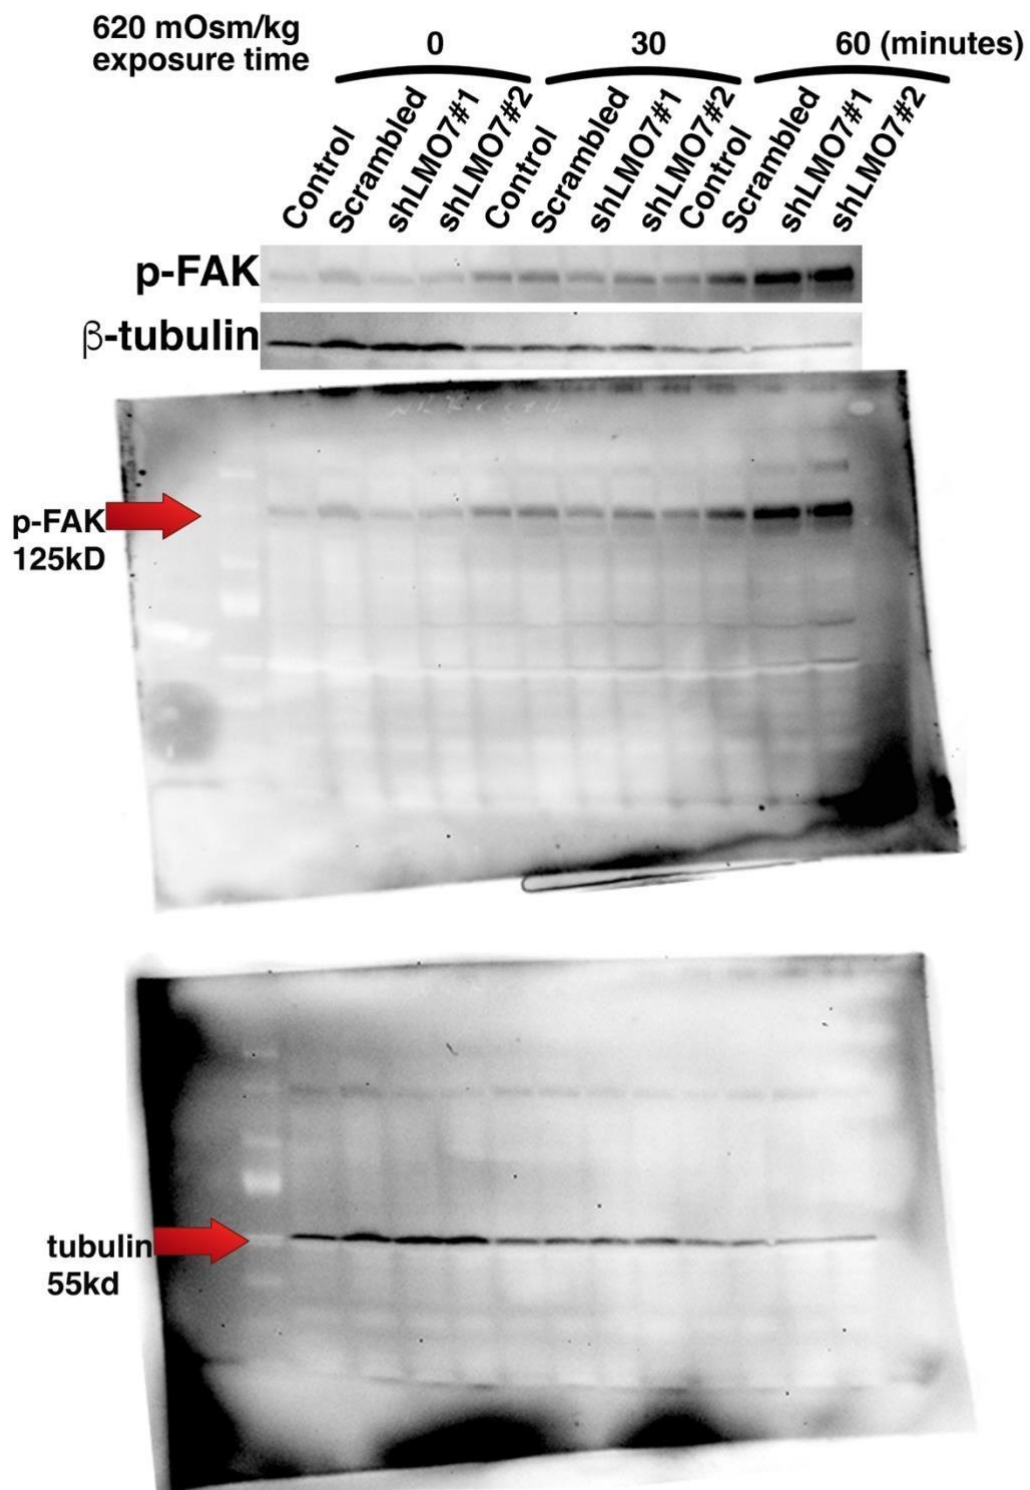

**Figure S10.** FAK phosphorylation in the LMO7 depleted NRK-52E cells is relatively higher than the NRK-52E cells without LMO7 depletion.

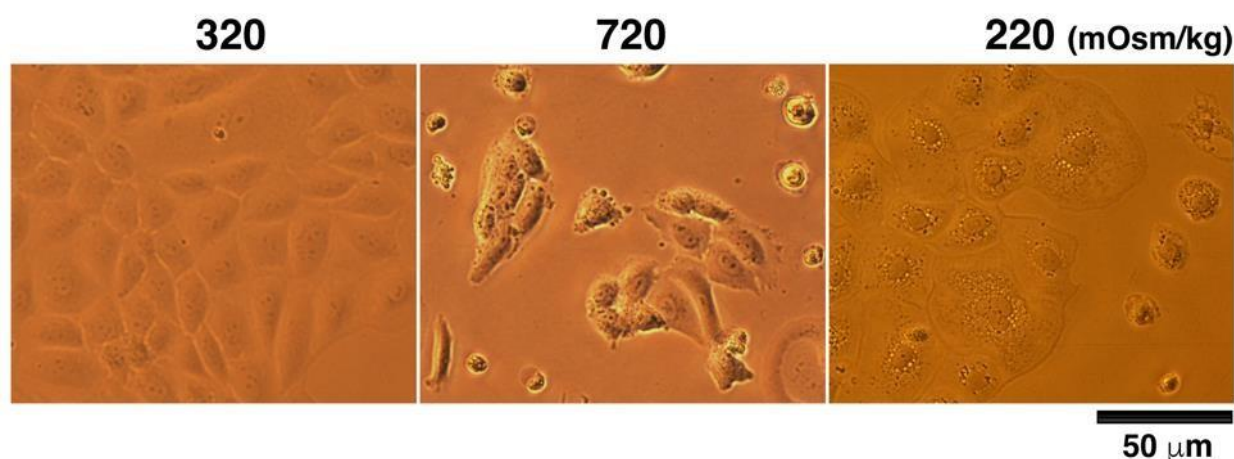

**Figure S11.** NRK-52E cells were damaged by osmotic stress. Under hypertonic or hypotonic condition, osmotic pressure forces push plasma membrane inward or outward. The osmotic pressure force pushes plasma outward cells got swelling when cells cultured in hypotonic medium. When cells cultured in hypertonic medium, the osmotic pressure force pushes plasma membrane inward and cells got shrinkage. The osmotic stress also caused cell death, as noted imaging, dead cells were observed in the hypertonic or hypertonic cultures .

**Table S1.** 241 proteins identified in 620 mOsm/kg conditioned medium.

Histone cluster 1 H1 family member c  
 Thioredoxin-like protein 1  
 AP-2 complex subunit beta  
 Protein phosphatase 2 (Formerly 2A), regulatory subunit A (PR 65), alpha isoform, isoform CRA\_a  
 Eftud2 protein (Fragment)  
 Proliferation-associated protein 2G4  
 DEAH (Asp-Glu-Ala-His) box polypeptide 15 (Predicted), isoform CRA\_b  
 EPS8-like 2  
 IQ motif containing GTPase activating protein 1 (Predicted), isoform CRA\_b  
 Nuclear ubiquitous casein and cyclin-dependent kinase substrate 1  
 Far upstream element-binding protein 1  
 40S ribosomal protein S28  
 Bleomycin hydrolase  
 Heterogeneous nuclear ribonucleoprotein Q  
 AIP1, isoform CRA\_a  
 T-complex protein 1 subunit epsilon  
 RNA binding motif protein, X-linked-like 1B  
 Protein SEC13 homolog  
 RCG31311  
 RCG50226, isoform CRA\_a  
 Enhancer of rudimentary homolog  
 AHNAK nucleoprotein  
 Protein S100-A11  
 Transaldolase  
 Naca protein  
 Hnrnp1 protein (Fragment)  
 Sf3b3 protein (Fragment)  
 Chaperonin containing Tcp1, subunit 6A (Zeta 1)  
 Hypoxanthine phosphoribosyltransferase (Fragment)

Leukotriene A-4 hydrolase  
NSFL1 cofactor p47  
Tropomyosin 1, alpha, isoform CRA\_i  
Microtubule-associated protein  
Pls3 protein (Fragment)  
Actin-related protein 2/3 complex subunit 4  
Cleavage and polyadenylation specific factor 6, 68kDa (Predicted), isoform CRA\_b  
Protein-lysine 6-oxidase  
Lupus La protein homolog  
UDP-glucose:glycoprotein glucosyltransferase 1  
Arp2/3 complex 34 kDa subunit  
Proteasome activator complex subunit 2  
Endoplasmic reticulum resident protein 29  
Heterogeneous nuclear ribonucleoprotein A3  
SPT16 homolog, facilitates chromatin-remodeling subunit  
Proteasome subunit alpha type-6  
Elongation factor 1-delta  
Ribosomal protein (Fragment)  
RAN GTPase-activating protein 1  
Transcription intermediary factor 1-beta  
Aly/REF export factor  
RCG34610, isoform CRA\_c  
Proliferating cell nuclear antigen  
Coatmer subunit beta  
Alpha glucosidase 2 alpha neutral subunit (Predicted)  
Acylphosphatase  
Peptidylprolyl isomerase (Fragment)  
Periostin  
TRK-fused gene protein  
Glia maturation factor beta  
Polypyrimidine tract binding protein 1, isoform CRA\_c  
Heterogeneous nuclear ribonucleoprotein D0  
Tubulin alpha chain  
Phosphoserine aminotransferase  
Cellular nucleic acid-binding protein  
F-actin-capping protein subunit alpha-1  
40S ribosomal protein S14  
Thimet oligopeptidase  
Sorbitol dehydrogenase  
Eprs protein (Fragment)  
SUMO-activating enzyme subunit 2  
DNA helicase  
Eukaryotic translation initiation factor 3 subunit A  
Similar to ubiquitin-conjugating enzyme E2 variant 1  
60S ribosomal protein L5  
Eukaryotic translation initiation factor 2 subunit 1  
Slit homolog 2 protein (Fragment)

Hsp90 co-chaperone Cdc37  
Similar to tropomyosin 1, embryonic fibroblast-rat, isoform CRA\_c  
U5 small nuclear ribonucleoprotein 200 kDa helicase  
S-phase kinase-associated protein 1  
Peptidyl-prolyl cis-trans isomerase FKBP4  
Na(+)/H(+) exchange regulatory cofactor NHE-RF1  
Drebrin-like protein  
Eukaryotic translation initiation factor 1  
Vasodilator-stimulated phosphoprotein  
DnaJ (Hsp40) homolog, subfamily B, member 4  
Malate dehydrogenase, mitochondrial  
Small nuclear ribonucleoprotein Sm D2  
LIM domain 7  
Splicing factor proline and glutamine rich  
Tight junction protein 1 (Predicted)  
Protein S100-A1  
Retinal dehydrogenase 2  
Staphylococcal nuclease domain-containing protein 1  
Glycine--tRNA ligase (Fragment)  
RAN-binding protein 1  
Glyoxalase domain-containing protein 4  
Coatmer subunit alpha  
Calcyclin-binding protein  
Septin-7  
Platelet-activating factor acetylhydrolase IB subunit beta  
Histone H1.5  
Acidic leucine-rich nuclear phosphoprotein 32 family member B  
40S ribosomal protein S12  
T-complex protein 1 subunit eta  
Non-POU domain-containing octamer-binding protein  
Rab GDP dissociation inhibitor alpha  
Protein kinase C substrate 80K-H  
Stress-induced-phosphoprotein 1  
Clathrin-assembly lymphoid myeloid leukemia protein  
Plectin  
U2 snRNP auxiliary factor large subunit  
Arginine--tRNA ligase, cytoplasmic  
Coatmer subunit gamma-1  
Elongation factor 1-gamma  
40S ribosomal protein SA  
Hyou1 protein  
LIM and SH3 domain protein 1  
Dead end homolog 1 (Zebrafish)  
Methanethiol oxidase  
Septin 6 (Predicted), isoform CRA\_b  
60S acidic ribosomal protein P1  
LIM domain and actin-binding protein 1

Caldesmon 1, isoform CRA\_b  
Protein O-glucosyltransferase 3  
Serine/arginine-rich splicing factor 2  
Prenylcysteine oxidase  
Platelet-activating factor acetylhydrolase IB subunit alpha  
40S ribosomal protein S3  
Dynamin-1-like protein  
Eukaryotic translation initiation factor 4A1  
RuvB-like helicase  
F-actin-capping protein subunit beta  
Keratin, type I cytoskeletal 10  
Dipeptidyl peptidase 3  
Ube2l3 protein  
Actin-related protein 2/3 complex subunit 1B  
Caprin-1  
Heterogeneous nuclear ribonucleoprotein F  
Nuclear transport factor 2  
Destrin  
Cytoplasmic dynein 1 heavy chain 1  
Far upstream element-binding protein 2  
WD repeat-containing protein 1  
Chromosome segregation 1-like  
Protein transport protein SEC23  
Radixin  
Vascular endothelial growth factor C  
KH domain-containing, RNA-binding, signal transduction-associated protein 1  
Ptges3 protein  
Lamina-associated polypeptide 2, isoform beta  
Septin-2  
BWK4  
Actin, beta-like 2  
F-actin-capping protein subunit alpha-2  
Keratin, type II cytoskeletal 1  
Xaa-Pro aminopeptidase 1  
Latent-transforming growth factor beta-binding protein 3  
Plasminogen activator inhibitor 1 RNA-binding protein  
10 kDa heat shock protein, mitochondrial  
Lamin-B1  
Eukaryotic translation initiation factor 3 subunit B  
Catenin (Cadherin associated protein), alpha 1  
Biliverdin reductase B  
Serine/threonine-protein phosphatase PP1-alpha catalytic subunit  
Proteasome subunit alpha type-4  
Sulfhydryl oxidase  
Serine protease inhibitor  
40S ribosomal protein S8  
DNA-(apurinic or apyrimidinic site) lyase (Fragment)

N-acetylneuraminase synthase  
Spectrin alpha chain, non-erythrocytic 1  
Spliceosomal protein SAP155 (Fragment)  
Nucleosome assembly protein 1-like 1  
Protein arginine methyltransferase 1-like  
Proteasome activator complex subunit 1  
Galectin  
Thioredoxin reductase 1, cytoplasmic  
40S ribosomal protein S9  
Carbonyl reductase [NADPH] 1  
SUMO-conjugating enzyme UBC9-like  
6-phosphogluconate dehydrogenase, decarboxylating  
T-complex protein 1 subunit gamma  
Heat shock 27kDa protein 1  
Thymosin beta-10  
FACT complex subunit SSRP1  
RNA-binding protein EWS-like  
Histone-binding protein RBBP7  
Annexin A3  
Exportin-1  
Serine-threonine kinase receptor-associated protein-like  
Importin subunit beta-1  
C-C motif chemokine 20  
Heterogeneous nuclear ribonucleoprotein C  
Eukaryotic translation initiation factor 3 subunit E  
Receptor of activated protein C kinase 1  
Ribosomal protein S19-like  
Nucleobindin 2, isoform CRA\_b  
Pre-mRNA-processing factor 19  
Caveolae-associated protein 1  
40S ribosomal protein S21  
DEAD (Asp-Glu-Ala-Asp) box polypeptide 5 (Fragment)  
Small nuclear ribonucleoprotein E  
Glyceraldehyde-3-phosphate dehydrogenase  
RCG45615, isoform CRA\_a  
Talin-1  
Transgelin  
Serpine H1  
Coatomer subunit beta'  
Peptidylprolyl isomerase  
Actin-related protein 3  
Nucleophosmin  
Pyrophosphatase (inorganic) 1  
Peroxiredoxin  
Lactoylglutathione lyase  
C-type mannose receptor 2  
Regulator of chromosome condensation 2

FUS RNA-binding protein  
 MHC class I RT1.Aw3 protein  
 Prolylcarboxypeptidase  
 T-complex protein 1 subunit alpha  
 ELAV-like protein 1  
 Multifunctional protein ADE2  
 T-complex protein 1 subunit beta  
 Calmodulin-1  
 Adenylyl cyclase-associated protein 1  
 Clathrin heavy chain  
 RNA-binding protein 3  
 Osteopontin  
 Fatty acid synthase  
 Fibulin-5  
 Adenosylhomocysteinase  
 Inositol-1-monophosphatase  
 Histone H3  
 T-complex protein 1 subunit delta  
 Aspartyl aminopeptidase  
 Acidic leucine-rich nuclear phosphoprotein 32 family member E  
 RB-binding protein 4, chromatin-remodeling factor  
 Activated RNA polymerase II transcriptional coactivator p15 Poly(rC)-binding protein 3 von Willebrand factor A domain-containing protein 1

**Table S2.** Extracellular proteins in the secretome profiling of NRK-52E exposed to 620 mOsm/kg.

| Gene Symbol | Protein Description                                           | Function                                               | Pathway                    | Remark |
|-------------|---------------------------------------------------------------|--------------------------------------------------------|----------------------------|--------|
| ACTR3       | Actin-related protein 3                                       | Actin nucleation                                       | Actin dynamics             | 4      |
| ALDH1       | Aldehyde Dehydrogenase 1 Family Member A1                     | regulation of the metabolic responses to high-fat diet | Signaling by retinoic acid | 4      |
| ANP32B      | Acidic leucine-rich nuclear phosphoprotein 32 family member B | Cysteine-type endopeptidase activity                   | Apoptotic pathway          | 4      |
| ANXA3       | Annexin A3                                                    | Inhibition of phospholipase A2                         | Prostaglandin regulation   | 4      |
| ARPC1B      | Actin-related protein 2/3 complex subunit 1B                  | Actin nucleation                                       | Actin dynamics             | 4      |
| ARPC2       | Arp2/3 complex 34 kDa subunit                                 | Actin nucleation                                       | Actin dynamics             | 4      |
| ARPC4       | Actin Related Protein 2/3 Complex Subunit 4                   | Actin nucleation                                       | Actin dynamics             | 4      |
| BLMH        | Bleomycin hydrolase                                           | Cysteine peptidase                                     | Unknown                    | 4      |
| BLVRB       | Biliverdin reductase B                                        | Heme metabolism                                        | Metabolism of porphyrins   | 4      |
| CACYBP      | Calcyclin-binding protein                                     | Calcium-dependent ubiquitination                       | Proteosomal degradation    | 4      |
| CALM1       | Calmodulin 1                                                  | Regulation on ion channel and aquaporins               | RET signaling              | 4      |
| CAPZA2      | F-actin-capping protein subunit alpha-2                       | Barbed-end actin binding protein                       | Actin dynamics             | 4      |
| CCL20       | C-C Motif Chemokine Ligand 20                                 | cytokine                                               | inflammation               | 5      |

|          |                                                                                                |                                                                                  |                                                                                                         |   |
|----------|------------------------------------------------------------------------------------------------|----------------------------------------------------------------------------------|---------------------------------------------------------------------------------------------------------|---|
| CCT6A    | Chaperonin Contain-<br>ing TCP1 Subunit 6A                                                     | Component of TCP1 ring complex (TRIC)                                            | Chaperonin-mediated protein<br>folding                                                                  | 4 |
| CLTC     | Clathrin heavy chain                                                                           | clathrin-coated vesicles                                                         | GAP junction trafficking                                                                                | 4 |
| DNM1     | Dynamin 1                                                                                      | GTP binding protein                                                              | Clathrin mediated endocytosis                                                                           | 4 |
| DNPEP    | Aspartyl aminopepti-<br>dase                                                                   | Peptide metabolism                                                               | Unknown                                                                                                 | 4 |
| DPP3     | Dipeptidyl peptidase 3                                                                         | Metallopeptidase                                                                 | Cleaves and degrades bioactive<br>peptides, such as angiotensin, Leu-<br>enkephalin, and Met-enkephalin | 4 |
| DSTN     | Destrin, an actin de-<br>polymerizing factor                                                   | Actin depolymerization                                                           | Actin Cytoskeleton remodeling                                                                           | 4 |
| EPS8L2   | EPS8-like 2                                                                                    | EPS8 gene family                                                                 | Membrane ruffling and actin Re-<br>modeling                                                             | 4 |
| FBLN5    | Fibulin 5                                                                                      | Extracellular matrix protein                                                     | Elastic fiber formation                                                                                 | 5 |
| FKBP4    | FKBP prolyl isomerase<br>4                                                                     | Cis-trans prolyl isomerase                                                       | Protein folding and trafficking                                                                         | 4 |
| GLO1     | Lactoylglutathione Ly-<br>ase                                                                  | Formation of S-lactoylglutathione                                                | TNF signaling                                                                                           | 4 |
| HSPB1    | Heat shock protein<br>family B member1                                                         | Molecular chaperone and protein folding                                          | RET signaling                                                                                           | 4 |
| HYOU1    | Hypoxia up-regulated<br>1                                                                      | Protein folding and secretion                                                    | Unfolded protein response                                                                               | 4 |
| LGALS1   | galectin 1                                                                                     | $\beta$ -galactoside-binding proteins                                            | Modulating cell-cell and cell-ECM<br>interaction                                                        | 5 |
| LOX      | Protein-Lysine 6-Oxi-<br>dase                                                                  | crosslinking of collagen and elastin                                             | Collagen and elastic fibre assem-<br>bly                                                                | 5 |
| LTA4H    | Leukotriene A4 Hy-<br>drolase                                                                  | an enzyme contains both hydrolase and ami-<br>nopeptidase activities             | inflammation                                                                                            | 4 |
| LTBP3    | Latent Transforming-<br>growth factor $\beta$ bind-<br>ing protein 3                           | Forming a complex with TGF- $\beta$                                              | Apoptotic pathway                                                                                       | 5 |
| NACA     | Nascent polypeptide<br>associated Complex<br>subunit $\alpha$                                  | Assembly of thin and thick filament                                              | ERK signaling                                                                                           | 4 |
| NANS     | N-Acetylneuraminate<br>synthase                                                                | Generating phosphorylated forms of Neu5Ac                                        | Biosynthetic pathway of sialic ac-<br>ids                                                               | 4 |
| PAFAH1B1 | Platelet activating fac-<br>tor acetylhydrolase 1b                                             | platelet activating acetylhydrolase                                              | Organelle biogenesis                                                                                    | 4 |
| PAFAH1B2 | $\alpha$ 2 catalytic subunit of<br>type I platelet-activat-<br>ing factor acetylhydro-<br>lase | platelet activating acetylhydrolase                                              | Organelle biogenesis                                                                                    | 4 |
| PLEC     | Plectin, actin-interme-<br>diated filament cross-<br>linking factor                            | anchors intermediate filaments to desmosomes                                     | Cell-junction organization                                                                              | 4 |
| POSTN    | periostin                                                                                      | secreted extracellular matrix protein                                            | Oncogenic pathway                                                                                       | 4 |
| QSOX1    | Sulfhydryl Oxidase 1                                                                           | Catalyzing the oxidation of sulfhydryl groups in<br>peptide thiols to disulfides | Cellular quiescence                                                                                     | 5 |
| RACK1    | Receptor for activated<br>C kinase 1                                                           | Scaffolding protein                                                              | TNF signaling                                                                                           | 4 |
| RDX      | Radixin                                                                                        | Linking F-actin to plasma                                                        | Rho A pathway                                                                                           | 4 |
| S100A1   | S100 calcium binding<br>protein A1                                                             | member of the S100 family                                                        | Ca <sup>2+</sup> homeostasis                                                                            | 4 |
| S100A11  | S100 calcium binding<br>protein A11                                                            | member of the S100 family                                                        | Cell motility                                                                                           | 4 |

|        |                                                          |                                                                  |                                                              |   |
|--------|----------------------------------------------------------|------------------------------------------------------------------|--------------------------------------------------------------|---|
| SLC9A3 | sodium/hydrogen exchanger regulatory co-factor           | Na(+)/H(+) exchange regulatory cofactor NHE-RF1                  |                                                              | 4 |
| SSP1   | Secreted phosphoprotein 1, osteopontin                   | Cytokine, Cell-ECM interaction                                   | Integrin pathway                                             | 5 |
| TCP1A  | A member of the chaperonin containing TCP1 complex (CCT) | Molecular chaperone complex, ATP dependent protein folding       | Regulation on ciliogenesis, and transports vesicles to cilla | 4 |
| TXNRD1 | Thioredoxin Reductase                                    |                                                                  |                                                              |   |
| VASP   | Vasodilator Stimulated Phosphoprotein                    | Cytoskeleton remodeling and cell polarity                        | Cell-junction organization                                   | 4 |
| VEGFC  | Vascular endothelial growth factor C                     | Angiogenesis, endothelial cell growth, Blood vessel permeability | VEGFR2 and VEGFR3 signaling                                  | 5 |
| VWA1   | Von Willebrand Factor A Domain Containing 1              | extracellular matrix proteins                                    |                                                              | 5 |

Confidence score for protein being released to outside of cell as an extracellular protein is evaluated with GeneCards version 5.9. The proteins that listed in secretome profiling are categorized to extracellular proteins, when extracellular localization was scored 4 and more.

**Table S3.** Detailed material information.

| Reagent Or Resource                     | Source            | Identifier      | Working Status                             |
|-----------------------------------------|-------------------|-----------------|--------------------------------------------|
| <b>Antibodies</b>                       |                   | <b>Company</b>  |                                            |
| Anti-LMO7                               | Santa Cruz        |                 | 1/500 for Western and IF and 1/200 for IHC |
| Anti-p-FAK                              | cell signaling    | Cat# 3281       | 1/500 for IF, 1/500 for Western            |
| Anti-Emerin                             | Santa Cruz        |                 | 1/500 for IF                               |
| Anti-β-catenin                          | Santa Cruz        | Cat#            | 1/500 for IF                               |
| Anti-α-Actinin                          | Santa Cruz        | Cat# SC-17829   | 1/500 for IF                               |
| Anti-p-Paxillin                         | Santa Cruz        | Cat#SC-14035    | 1/500 for IF                               |
| Anti-Ecadherin                          | Arigo             | Cat#ARG66195    | 1/1000 for IF                              |
| anti-ZO1                                | ThermoFisher      | Cat#40-220      | 1/500 for IF                               |
| anti-NKCC2                              | cell signaling    | Cat#            | 1/500 for IF, 1/200 for IHC                |
| anti-β-actin                            | Arigo             | Cat# ARG62346   | 1/10,000 for Western                       |
| Goat anti-mouse IgG-HRP                 | ROYEZ             | Cat#C04001-2ML  | 1/10,000 for Western                       |
| Goat anti-Rabbit IgG-HRP                | ROYEZ             | Cat#C04003-2ML  | 1/10,000 for Western                       |
| Alex-488 donkey anti-mouse IgG          | Jackson ImmunoRes | Cat#715545150   | 1/1,000 for IF                             |
| Alex-594 donkey anti-mouse IgG          | Jackson ImmunoRes | Cat#715585150   | 1/1,000 for IF                             |
| Alex-488 donkey anti-rabbit IgG         | Jackson ImmunoRes | Cat#711545152   | 1/1,000 for IF                             |
| Alex-594 donkey anti-rabbit IgG         | Jackson ImmunoRes | Cat#711185152   | 1/1,000 for IF                             |
| <b>Chemicals, Enzymes and Materials</b> |                   |                 |                                            |
| Immunohistochemical kit                 | BIOTnA            | Cat#TAHC01D-100 |                                            |
| Hematoxylin                             | Leica             | Cat#3801522     |                                            |
| DAPI                                    | AAT BioQuest      | Cat#17513       | 2μg/mL for IF                              |
| PF-573228                               | MCE               | Cat#HY-10461    | Stock: 10 μM                               |
| Phalloidin iFluoro594                   | AAT BioQuest      | Cat#23115       | 1/1,000 for IF                             |
| Urea                                    | J.T. Baker        | Cat#420301      | Stock: 5M                                  |
| NaCl                                    | Sigma-Aldrich     | Cat#7647-14-5   | Stock: 5M                                  |
| Phosphatase inhibitor                   | Biotools          | Cat#TAAR-BB13   |                                            |
| Protease inhibitor                      | Biotools          | Cat#3Taar-BB12  |                                            |
| Ultrafiltration Vivaspin20              | Sartorius         | Cat#VCA002      |                                            |
| T-PER Tissue protein Ripa               | ThermoFisher      | Cat#78510       |                                            |
| Pierce BCA protein assay kit            | ThermoFisher      | Cat#23225       |                                            |
| PVDF membrane                           | Merck             | Cat#IEVH00005   |                                            |
| Protein standard                        | Biomate           | Cat#BR0671      |                                            |
| Protein standard                        | Biomate           | Cat#BR1811      |                                            |

|                                      |                  |                       |               |
|--------------------------------------|------------------|-----------------------|---------------|
| chemiluminescence                    | ThermoFisher     | Cat# 34096            |               |
| chemiluminescence                    | Visual Protein   | Cat# LF08-500         |               |
| 30% Acrylamide                       | Bionovas         | Cat# AA0230-0500      |               |
| Triton X-100                         | Amresco          | Cat#0694-1L           |               |
| Paraformylaldehyde                   | Merck            | Cat#K28526995         |               |
| Fetal bovine Serum                   | Gibco            | Cat#10437028          |               |
| Dulbeco;s Modified Eagle medium      | Gibco            | Cat#12100061          |               |
| Glutamine                            | ThermoFisher     | Cat#25030081          |               |
| Penicillium/Stretomycin              | Gibco            | Cat#15140122          |               |
| Trypsin                              | ThermoFisher     | Cat#25520056          |               |
| Lipofetamine 2000                    | ThermoFisher     | Cat#11668030          |               |
| Opti-MEM                             | ThermoFisher     | Cat#31-985-070        |               |
| Small interffering RNA, siLuciferase |                  |                       |               |
| siLMO7#1 siLMO7#2                    |                  |                       |               |
| Apoptosis detection kit              | BioVision        |                       | Cat#K200      |
| collagenase type II                  | Merk             |                       | Cat#9001-12-1 |
| Hydrocortisone                       | Merk             |                       | Cat#H0888     |
| Transferrin                          | Merk             |                       | Cat#T8158     |
| Insulin                              | Merk             |                       | Cat#          |
| <b>Others</b>                        |                  |                       |               |
| Microscopy DM16000B                  | Leica            |                       |               |
| Imaging system DFC360FC              | Leica            |                       |               |
| X-Citye XCT10A light source          | Lumen Dynamic    |                       |               |
| Panoramic MIDI digital scanner       | 3DHISTECH        |                       |               |
| ChemiDoc System                      | Bio-Rad          |                       |               |
| Flow cytometry                       | Backman          |                       |               |
| Image-Pro Plus                       | MediaCybernetics |                       |               |
| Prism 8                              | GraphPad         |                       |               |
| <b>Cell Lines</b>                    | <b>Company</b>   | <b>Catalog Number</b> | <b>Medium</b> |
| NRK-52E                              | ATCC             | ATCC CCL-1571         | DMEM+10% FBS  |
